# Supplementary material for: Quantitative proteomics analysis of zebrafish exposed to sub-lethal dosages of β-methyl-amino-L-alanine (BMAA)
Source: PubMed Central journal article supplement (PMC4940735; doi:10.1038/srep29631), 2016-07-12
Supplement: srep29631-s1.pdf [file srep29631-s1.pdf]

**Quantitative proteomics analysis of zebrafish exposed to sub-lethal dosages of  $\beta$ -methyl-amino-L-alanine (BMAA)**

Ann Kristin Frøyset, Essa Ahsan Khan, and Kari Espolin Fladmark

Department of Molecular Biology, University of Bergen, Thormøhlensgate 55, 5020 Bergen, Norway.

## Legend supplementary data

### **Quantitative proteomics analysis of zebrafish exposed to sub-lethal dosages of $\beta$ -methyl-amino-L-alanine (BMAA)**

Ann Kristin Frøyset, Essa Ahsan Khan, and Kari Espolin Fladmark

Department of Molecular Biology, University of Bergen, Thormøhlensgate 55, 5020 Bergen, Norway.

**Figure S1: Multi-scatter correlation plots of technical replicates.** The LFQ intensities of each replicate of BMAA and CTR samples are plotted against each other. Pearson correlations are displayed for individual graph, showing a high level of reproducibility for all replicate and between BMAA and CTR samples.

**Table S1: Identified proteins using the reviewed UniProt database with 2945 entries.** For search criteria and data filtration see Material and Methods section.

**Table S2: Peptides identified using the reviewed UniProt database with 2945 entries.** For search criteria see Materials and Methods section. Reverse and potential contaminants are removed.

**Table S3: Identified proteins using the combined (unreviewed & reviewed) UniProtKB database with 58693 entries.** For search criteria and data filtration see Material and Methods section.

**Table S4: Peptides identified using the combined (unreviewed & reviewed) UniProtKB database with 58693 entries.** For search criteria see Materials and Methods section. Reverse and potential contaminants are removed.

**Table S5: Overview of total proteins and peptides identified in each technical replicate using reviewed UniProt database and combined (unreviewed & reviewed) UniProtKB database.**

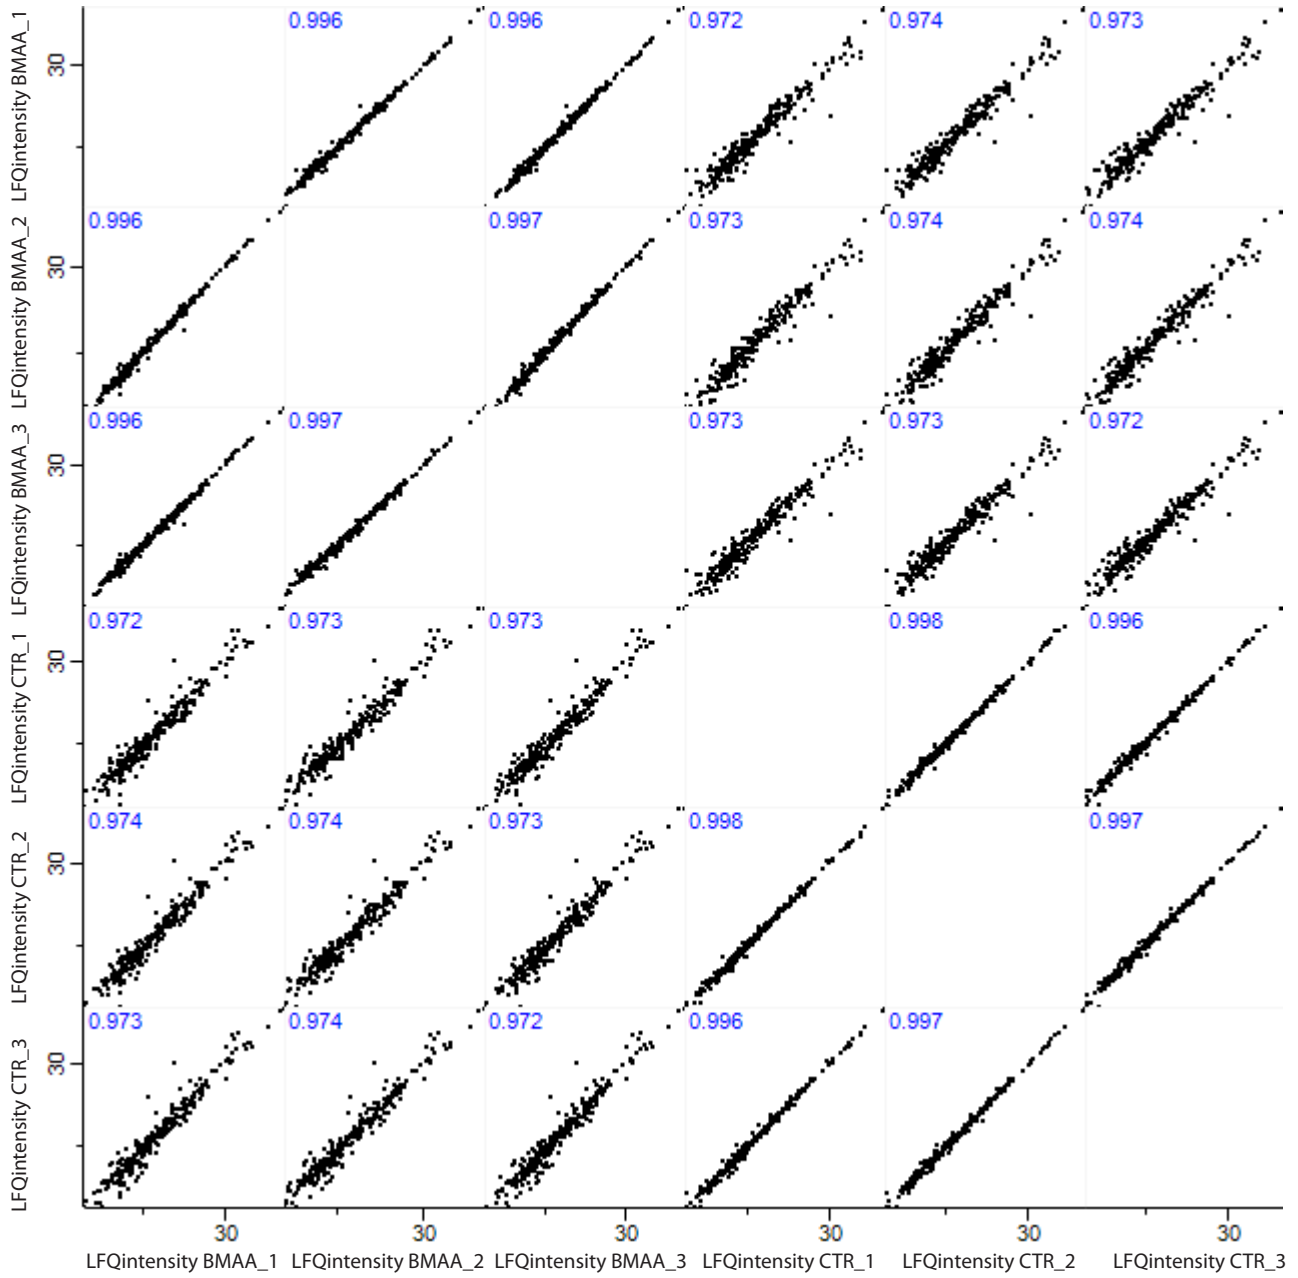

Quantitative proteomics analysis of zebrafish exposed to sub-lethal dosages of  $\beta$ -methyl-amino-L-alanine (BMAA)  
Ann Kristin Frøyset, Essa Ahsan Khan, and Kari Espolin Fladmark  
Department of Molecular Biology, University of Bergen, Thormøhlensgate 55, 5020 Bergen, Norway.

|               | Number of peptides |          | Number of proteins |          |
|---------------|--------------------|----------|--------------------|----------|
|               | UniProtKB          | Reviewed | UniProtKB          | Reviewed |
| <b>CTR_1</b>  | 14653              | 2028     | 1879               | 285      |
| <b>CTR_2</b>  | 14660              | 2029     | 1881               | 281      |
| <b>CTR_3</b>  | 14620              | 2014     | 1900               | 284      |
| <b>BMAA_1</b> | 13441              | 1870     | 1827               | 270      |
| <b>BMAA_2</b> | 13512              | 1868     | 1834               | 274      |
| <b>BMAA_3</b> | 13489              | 1861     | 1829               | 272      |

**Suppl. Table 5 Total number of peptides and proteins identified in replicates.** Table shows peptides and proteins identified using combined database (UniProtKB) and reviewed database meeting the criteria set for Suppl. Tables 1 and 2.
